# Supplementary material for: Systematic Analysis of Circadian Genes in a Population-Based Sample Reveals Association of TIMELESS with Depression and Sleep Disturbance
Source: PLoS One. 2010 Feb 18;5(2):e9259. doi: 10.1371/journal.pone.0009259 (PMC2823770; doi:10.1371/journal.pone.0009259)
Supplement: Table S1 — Complete results for analysis between depressive disorder and SNPs of the circadian clock genes in females from Finnish population. aSNPs yielding permutated pointwise p-values, bold are SNPs having the p-values < 0.05 in the single-locus analyses. bAlleles: Major/Minor. D+, patients with depression. D-, controls (no depression). D+EMA+, depressed patients with early morning awakening. D-EMA-, controls without early morning awakening. D+FAT+, depressed patients with fatigue. D-FAT-, controls without fatigue. *SNP indicated permutation-based corrected empirical P-value (P<0.05) over the model D+FAT+ vs.D-FAT- . (0.05 MB XLS) [file pone.0009259.s003.xls]

## Sheet: Table_S1
Table S1. Complete results for analysis between depressive disorder and SNPs of the circadian clock genes in females from Finnish population.
					FEMALES
			Single locus analysis permutation-based P-value and odds ratio (OR) (95% CI)
Gene	SNPsa	Allelesb	D+ vs. D–		D+EMA+ vs. D–EMA–		D+FAT+ vs. D–FAT–
PER3	rs3753503	G/A	0.675	1.07(0.76-1.56)	0.331	1.27(0.78-2.04)	0.935	1.01(0.67-1.50)
	rs228729	C/T	0.279	0.88(0.72-1.11)	0.449	0.88(0.67-1.22)	0.069	0.79(0.64-1.05
	rs228682	T/C	0.154	0.85(0.69-1.06)	0.453	0.89(0.67-1.23)	0.053	0.78(0.63-1.02)
	rs228642	T/C	0.467	1.08(0.87-1.31)	0.578	1.08(0.79-1.41)	0.466	1.09(0.85-1.36)
	rs1891217	C/T	0.692	0.91(0.58-1.42)	0.756	1.13(0.62-2.03)	1	1.0(0.61-1.63)
	rs12035969	C/T	0.581	0.93(0.74-1.20)	0.931	0.98(0.73-1.43)	0.110	0.79(0.62-1.08)
	rs10462021	A/G	0.648	1.05(0.82-1.32)	0.865	1.03(0.73-1.42)	0.215	1.19(0.89-1.52)
PER2	rs881933	C/G	0.415	0.91(0.72-1.14)	0.745	0.94(0.67-1.29)	0.7033	0.94(0.72-1.21)
	rs934945	C/T	1	0.98(0.69-1.31)	0.341	1.23(0.79-1.82)	0.771	1.05(0.71-1.47)
	rs6431590	T/C	0.523	0.93(0.77-1.16)	0.297	0.85(0.64-1.15)	0.631	0.94(0.75-1.2)
	rs3739064	A/G	0.702	0.95(0.77-1.19)	0.208	0.82(0.61-1.15)	0.951	0.98(0.77-1.27)
	rs11894535	G/A	0.102	0.82(0.66-1.06)	0.154	0.78(0.56-1.09)	0.103	0.79(0.61-1.05)
	rs10462023	C/T	0.970	1.0(0.81-1.26)	0.716	1.06(0.80-1.46)	0.812	0.97(0.77-1.27)
	rs2304672	C/G	0.203	1.18(0.92-1.55)	0.615	1.10(0.77-1.64)	0.103	1.27(0.96-1.73)
	rs4663302	C/T	0.855	1.02(0.79-1.25)	0.256	1.19(0.86-1.61)	0.612	1.07(0.80-1.36)
NPAS2	rs1811399	A/C	0.256	1.15(0.93-1.51)	1	0.99(0.75-1.50)	0.347	1.14(0.90-1.55)
	rs12712083	A/G	0.425	1.08(0.87-1.32)	0.158	1.24(0.92-1.64)	0.733	1.04(0.82-1.30)
	rs2117714	A/G	0.203	1.15(0.93-1.45)	0.062	1.34(1.02-1.88)	0.323	1.13(0.90-1.49)
	rs6725296	G/A	0.183	1.22(0.93-1.66)	0.439	1.19(0.81-1.83)	0.470	1.14(0.83-1.61)
	rs3820785	A/G	0.835	1.02(0.82-1.31)	0.929	1.02(0.74-1.43)	0.552	1.09(0.84-1.42)
	rs17025078	G/A	0.368	0.87(0.66-1.15)	0.322	0.81(0.53-1.20)	0.818	0.96(0.70-1.31)
	rs2305160	G/A	0.816	0.97(0.75-1.19)	0.192	1.24(0.88-1.63)	1	0.99(0.74-1.24)
	S471L	C/T	0.807	0.96(0.73-1.25)	0.774	0.94(0.64-1.38)	0.551	0.91(0.67-1.23)
	rs1374324	G/A	0.318	1.11(0.91-1.37)	0.208	1.21(0.90-1.61)	0.338	1.12(0.89-1.42)
CLOCK	rs10462028	G/A	0.126	1.18(0.94-1.43)	0.296	1.17(0.84-1.52)	0.242	1.15(0.89-1.43)
	rs1801260	A/G	0.243	0.87(0.91-1.42)	0.436	0.93(0.83-1.53)	0.503	0.92(0.84-1.40)
	rs11932595	T/C	0.533	1.07(0.88-1.32)	0.990	1.0(0.74-1.33)	0.409	1.11(0.87-1.39)
	rs6850524	C/G	0.741	0.96(0.75-1.16)	0.484	1.11(0.80-1.46)	0.657	0.93(0.71-1.17)
	rs4864548	G/A	0.578	0.94(0.78-1.19)	0.276	0.83(0.65-1.19)	0.742	0.95(0.78-1.25)
NFIL3	rs1619450	T/C	0.022	0.64(0.46-0.95)	0.316	0.76(0.48-1.29)	0.017	0.59(0.39-0.91)
	rs10991925	A/G	0.033	1.31(1.01-1.65)	0.773	1.06(0.71-1.47)	0.227	1.19(0.87-1.54)
	rs2440589	G/A	1	0.99(0.82-1.24)	1	1.0(0.75-1.36)	0.422	0.90(0.71-1.15)
	rs968821	C/G	0.109	1.21(0.97-1.53)	0.608	1.08(0.78-1.51)	0.437	1.11(0.85-1.45)
	rs813498	T/C	0.171	0.54(0.23-1.35)	0.267	0.44(0.10-1.92)	0.505	0.68(0.28-1.73)
BHLHE40	rs908078	T/C	0.949	0.98(0.73-1.25)	0.071	0.68(0.43-1.01)	0.873	1.03(0.73-1.34)
	rs11130215	A/G	0.386	1.11(0.88-1.38)	0.651	0.92(0.66-1.28)	0.187	1.19(0.92-1.53)
	rs2137947	T/C	0.530	0.91(0.71-1.17)	0.860	1.03(0.72-1.44)	0.720	0.94(0.70-1.25)
CRY2	rs10838524	A/G	0.038	1.24(1.03-1.55)	0.010	1.45(1.11-1.99)	0.104	1.22(0.99-1.58)
	rs7123390	G/A	0.145	0.84(0.66-1.05)	0.116	0.76(0.53-1.04)	0.287	0.86(0.65-1.11)
	rs10838527	A/G	0.937	0.98(0.69-1.31)	0.736	0.91(0.57-1.43)	1	1.01(0.68-1.40)
	rs3824872	C/A	0.156	0.83(0.63-1.02)	0.155	0.76(0.53-1.06)	0.313	0.86(0.63-1.08)
ARNTL	rs2279287	C/T	0.686	0.95(0.77-1.20)	0.404	1.13(0.84-1.55)	0.592	1.07(0.85-1.39)
	rs10766074	T/C	0.681	1.06(0.82-1.46)	0.309	1.23(0.83-1.82)	0.512	1.12(0.83-1.59)
	rs1982350	G/A	0.033	1.24(1.04-1.55)	0.547	1.09(0.82-1.46)	0.04	1.27(1.03-1.63)
	rs6486121	C/T	0.043	0.80(0.64-0.96)	0.159	0.81(0.60-1.07)	0.04	0.78(0.61-0.97)
	rs1562438	C/T	0.327	1.11(0.93-1.44)	0.168	1.24(0.94-1.71)	0.338	1.13(0.92-1.51)
	rs2290036	T/C	0.713	1.05(0.76-1.42)	0.797	1.06(0.69-1.65)	0.424	1.14(0.79-1.59)
	rs1868049	C/T	0.964	1.0(0.75-1.33)	0.838	1.04(0.69-1.54)	0.663	1.07(0.78-1.48)
	rs11022778	T/G	0.768	1.03(0.84-1.32)	1	0.99(0.72-1.38)	0.496	0.91(0.71-1.21)
	rs3816358	C/A	0.499	0.89(0.68-1.22)	0.333	0.78(0.54-1.28)	0.982	0.99(0.73-1.41)
	rs4757151	G/A	0.280	1.11(0.90-1.34)	0.418	1.12(0.84-1.50)	0.319	1.12(0.88-1.40)
	rs3897902	A/C	0.874	1.02(0.75-1.36)	0.866	1.03(0.68-1.56)	0.818	0.96(0.67-1.34)
	rs969485	A/G	0.121	0.81(0.63-1.05)	0.587	0.90(0.63-1.28)	0.026	0.70(0.53-0.95)
ARNTL2	rs10842905	T/C	0.156	1.17(0.92-1.40)	0.132	1.26(0.93-1.68)	0.221	1.16(0.89-1.44)
	rs4964052	G/T	0.406	0.91(0.74-1.12)	0.056	0.74(0.53-0.97)	0.519	0.92(0.72-1.16)
	rs922270	T/C	0.07	1.31(0.99-1.82)	0.131	1.39(0.98-2.24)	0.110	1.35(0.98-1.97)
	rs4964060	G/A	0.391	0.91(0.75-1.13)	0.502	0.90(0.69-1.23)	0.371	0.89(0.71-1.14)
	rs7304939	C/T	0.471	1.13(0.81-1.6)	0.862	1.05(0.68-1.76)	0.447	1.16(0.81-1.75)
	rs12299407	T/C	0.333	1.14(0.88-1.51)	0.440	1.16(0.81-1.73)	0.374	1.15(0.84-1.57)
	rs1037921	A/G	0.498	1.14(0.80-1.68)	0.894	1.07(0.67-1.92)	0.504	1.16(0.78-1.80)
	rs4931075	G/A	0.911	1.01(0.82-1.28)	0.868	1.02(0.75-1.40)	0.603	1.07(0.82-1.37)
	rs2289709	C/T	0.753	1.06(0.78-1.46)	0.822	0.94(0.62-1.53)	1	1.01(0.72-1.48)
BHLHE41	rs1048155	C/G	0.325	1.11(0.91-1.38)	0.336	1.15(0.87-1.55)	0.954	1.01(0.80-1.29)
TIMELESS	rs2291739	T/C	0.072	1.21(0.97-1.46)	0.060	1.31(0.98-1.74)	0.0004	1.51(1.18-1.88)
	rs2291738	G/A	0.055	1.22(0.98-1.48)	0.110	1.26(0.96-1.71)	0.0006	1.52(1.20-1.91)
	*rs7486220	G/A	0.009	1.34(1.07-1.63)	0.003	1.55(1.16-2.08)	0.000099	1.66(1.31-2.10)
	rs1082214	C/T	0.030	0.60(0.39-0.94)	0.012	0.33(0.14-0.75)	0.126	0.66(0.40-1.11)
CRY1	rs2287162	C/G	0.914	0.98(0.79-1.23)	0.297	0.84(0.61-1.15)	0.699	0.94(0.74-1.22)
	rs2287161	G/C	0.737	0.96(0.78-1.17)	0.446	0.89(0.68-1.21)	0.247	0.87(0.69-1.10)
	rs10861683	T/A	0.721	1.04(0.84-1.31)	0.643	1.08(0.80-1.50)	0.498	1.09(0.86-1.43)
	rs11113179	G/A	0.848	0.94(0.65-1.38)	0.514	1.21(0.77-2.02)	0.660	0.90(0.60-1.41)
	rs3809237	A/G	0.956	0.99(0.80-1.21)	0.442	1.12(0.82-1.47)	0.862	1.02(0.80-1.29)
RORA	rs2290430	A/C	0.959	0.98(0.66-1.44)	0.271	1.35(0.85-2.24)	0.867	0.94(0.60-1.49)
	rs12914584	A/C	0.610	0.92(0.70-1.21)	1	1.0(0.69-1.48)	0.567	0.90(0.65-1.24)
	rs2028122	G/A	0.960	0.99(0.81-1.26)	0.865	0.96(0.72-1.35)	0.683	0.94(0.75-1.24)
	rs4775281	T/G	0.835	0.97(0.81-1.22)	0.914	0.97(0.76-1.36)	0.243	0.86(0.70-1.12)
	rs4774370	T/C	0.045	0.75(0.57-0.98)	0.449	0.85(0.57-1.20)	0.122	0.78(0.57-1.03)
	rs1863270	T/G	0.456	1.09(0.84-1.32)	0.561	1.11(0.76-1.45)	0.390	1.13(0.83-1.39)
	rs11637301	T/A	0.220	0.83(0.62-1.08)	0.925	0.97(0.64-1.37)	1	0.99(0.72-1.32)
	rs341373	G/A	0.263	0.88(0.70-1.1)	0.471	0.88(0.65-1.21)	0.688	0.94(0.73-1.21)
	rs8027829	C/T	0.048	0.81(0.66-1.01)	0.026	0.70(0.51-0.96)	0.300	0.88(0.69-1.13)
	rs16943429	A/G	0.461	0.90(0.69-1.15)	0.531	0.88(0.61-1.26)	0.889	0.97(0.72-1.28)
	rs1568717	G/T	0.921	1.01(0.84-1.35)	0.816	0.95(0.72-1.42)	0.775	0.95(0.77-1.32)
	rs893287	C/T	0.058	0.80(0.64-0.99)	0.345	0.85(0.61-1.14)	0.068	0.78(0.60-1.0)
	rs4774388	A/G	0.093	0.76(0.58-1.09)	0.128	0.68(0.45-1.13)	0.010	0.61(0.44-0.94)
	rs1816624	A/G	0.142	0.81(0.64-1.10)	0.521	0.87(0.60-1.28)	0.115	0.76(0.58-1.08)
	rs6494251	C/T	0.435	0.89(0.68-1.14)	0.617	0.90(0.63-1.31)	0.711	0.94(0.70-1.25)
	rs10438343	G/A	0.517	0.91(0.68-1.15)	0.908	0.96(0.65-1.35)	0.721	0.94(0.69-1.24)
TIPIN	rs3759785	G/A	0.773	1.10(0.65-2.0)	0.407	0.60(0.20-1.66)	0.515	1.27(0.71-2.46)
	rs3759786	G/T	0.531	0.90(0.69-1.24)	0.334	0.80(0.56-1.30)	0.402	0.85(0.63-1.24)
	rs2063690	C/G	1	0.98(0.70-1.46)	0.416	0.75(0.40-1.32)	0.665	1.11(0.73-1.69)
	rs8031897	T/C	0.59	1.06(0.87-1.37)	0.907	1.02(0.76-1.44)	0.540	1.09(0.86-1.45)
NR1D1	rs2314339	G/A	0.564	1.07(0.83-1.37)	0.290	1.20(0.86-1.70)	0.959	1.01(0.75-1.35)
	rs2071427	G/A	0.242	1.13(0.91-1.39)	0.317	1.17(0.89-1.61)	0.356	1.12(0.88-1.43)
	rs2269457	T/C	0.092	1.20(0.96-1.47)	0.147	1.24(0.93-1.69)	0.082	1.24(0.97-1.58)
	rs2071570	C/A	0.352	1.11(0.89-1.37)	0.508	1.11(0.83-1.53)	0.466	1.1(0.86-1.41)
PER1	rs2289591	G/T	0.217	1.17(0.90-1.49)	0.628	1.10(0.74-1.53)	0.056	1.31(0.96-1.68)
	rs2253820	G/A	0.324	0.85(0.62-1.15)	0.966	1.01(0.65-1.50)	0.241	0.80(0.56-1.14)
	rs3027188	G/C	1	1.0(0.72-1.37)	0.481	1.19(0.76-1.81)	0.778	0.93(0.63-1.33)
	rs885747	G/C	0.068	0.82(0.68-1.02)	0.132	0.79(0.61-1.09)	0.063	0.79(0.64-1.02)
	rs2518023	G/T	0.771	0.94(0.62-1.37)	0.477	1.20(0.70-1.97)	0.429	0.83(0.51-1.29)
DBP	rs3745733	G/A	0.999	1.0(0.77-1.33)	0.624	1.10(0.76-1.62)	1	1.0(0.73-1.37)
CSNK1E	rs135745	G/C	0.129	1.17(0.95-1.42)	0.107	1.27(0.93-1.66)	0.015	1.34(1.05-1.67)
	rs2075984	A/C	0.970	0.99(0.80-1.21)	0.991	1.0(0.76-1.35)	0.871	1.02(0.80-1.28)
	rs5750581	T/C	0.443	1.14(0.82-1.61)	0.609	1.13(0.70-1.82)	0.185	1.30(0.90-1.90)
	rs7289981	C/T	0.272	1.21(0.85-1.63)	0.060	1.56(0.97-2.26)	0.315	1.23(0.80-1.69)
aSNPs yielding permutated pointwise p-values, bold are SNPs having the p-values < 0.05 in the single-locus analyses.
bAlleles: Major/Minor.
D+, patients with depression.
D–, controls (no depression).
D+EMA+, depressed patients with early morning awakening.
D–EMA–, controls without early morning awakening.
D+FAT+, depressed patients with fatigue.
D–FAT–, controls without fatigue.
*SNP indicated permutation-based corrected empirical P-value (P<0.05) over the model D+FAT+ vs.D–FAT– .
