# Supplementary material for: Systematic Analysis of Circadian Genes in a Population-Based Sample Reveals Association of TIMELESS with Depression and Sleep Disturbance
Source: PLoS One. 2010 Feb 18;5(2):e9259. doi: 10.1371/journal.pone.0009259 (PMC2823770; doi:10.1371/journal.pone.0009259)
Supplement: Table S6 — Power calculations. (0.03 MB XLS) [file pone.0009259.s008.xls]

## Sheet: Table_S6
Table S6. Power calculations.
Power calculations at alpha = 0.05
Female study samples						Male study samples
Relative Risk	Marker allele frequency					Relative Risk	Marker allele frequency
	0.05	0.1	0.2	0.3	0.4		0.05	0.1	0.2	0.3	0.4
1.4	0.375	0.548	0.649	0.613	0.51	1.4	0.314	0.314	0.380	0.354	0.287
1.5	0.524	0.719	0.807	0.767	0.655	1.5	0.300	0.438	0.516	0.475	0.383
1.6	0.664	0.846	0.907	0.872	0.769	1.6	0.397	0.563	0.642	0.589	0.476
1.7	0.781	0.925	0.960	0.934	0.852	1.7	0.497	0.678	0.748	0.689	0.563
1.8	0.868	0.967	0.984	0.968	0.908	1.8	0.596	0.774	0.830	0.770	0.640
1.9	0.927	0.987	0.994	0.985	0.944	1.9	0.686	0.848	0.889	0.833	0.706
2.0	0.962	0.995	0.998	0.993	0.966	2.0	0.764	0.903	0.930	0.881	0.761
2.1	0.981	0.998	0.999	0.997	0.979	2.1	0.828	0.940	0.957	0.916	0.806
2.2	0.991	0.999	0.999	0.998	0.987	2.2	0.879	0.964	0.974	0.941	0.844
Power calculations at alpha = 0.000073
Female study samples						Male study samples
Relative Risk	Marker allele frequency					Relative Risk	Marker allele frequency
	0.05	0.1	0.2	0.3	0.4		0.05	0.1	0.2	0.3	0.4
1.4	0.010	0.029	0.052	0.042	0.023	1.4	0.002	0.006	0.010	0.008	0.005
1.5	0.025	0.077	0.127	0.101	0.054	1.5	0.005	0.015	0.024	0.019	0.010
1.6	0.056	0.162	0.247	0.192	0.102	1.6	0.011	0.032	0.050	0.037	0.019
1.7	0.109	0.286	0.399	0.311	0.168	1.7	0.022	0.061	0.090	0.065	0.032
1.8	0.188	0.436	0.557	0.442	0.249	1.8	0.038	0.105	0.146	0.102	0.049
1.9	0.290	0.589	0.699	0.570	0.338	1.9	0.064	0.164	0.217	0.149	0.071
2.0	0.409	0.725	0.81	0.683	0.429	2.0	0.099	0.240	0.298	0.204	0.097
2.1	0.533	0.83	0.887	0.775	0.517	2.1	0.145	0.327	0.387	0.265	0.127
2.2	0.650	0.902	0.937	0.845	0.598	2.2	0.202	0.421	0.476	0.329	0.159
2.3	0.752	0.948	0.966	0.896	0.669	2.3	0.268	0.516	0.562	0.394	0.194
2.4	0.834	0.974	0.982	0.932	0.731	2.4	0.342	0.607	0.640	0.458	0.231
2.5	0.894	0.987	0.991	0.956	0.782	2.5	0.421	0.689	0.710	0.520	0.268
2.6	0.936	0.994	0.995	0.972	0.825	2.6	0.501	0.761	0.770	0.577	0.305
2.7	0.963	0.997	0.998	0.982	0.860	2.7	0.579	0.821	0.820	0.630	0.342
2.8	0.979	0.999	0.999	0.989	0.888	2.8	0.652	0.868	0.861	0.678	0.378
2.9	0.989	0.999	0.999	0.993	0.911	2.9	0.719	0.905	0.893	0.720	0.413
3.0	0.994	0.999	0.999	0.995	0.929	3.0	0.777	0.933	0.919	0.758	0.447
3.1	0.997	0.999	0.999	0.997	0.943	3.1	0.827	0.954	0.939	0.791	0.479
3.2	0.998	1	1	0.998	0.954	3.2	0.868	0.968	0.954	0.820	0.510
